# Supplementary material
Source: Springer Nature journal article supplement (https://www.springermedizin.de/resource/supplementary/12888_2010_796_MOESM5_ESM.pdf/9478788)

## Inattention

## Hyperactivity / Impulsivity

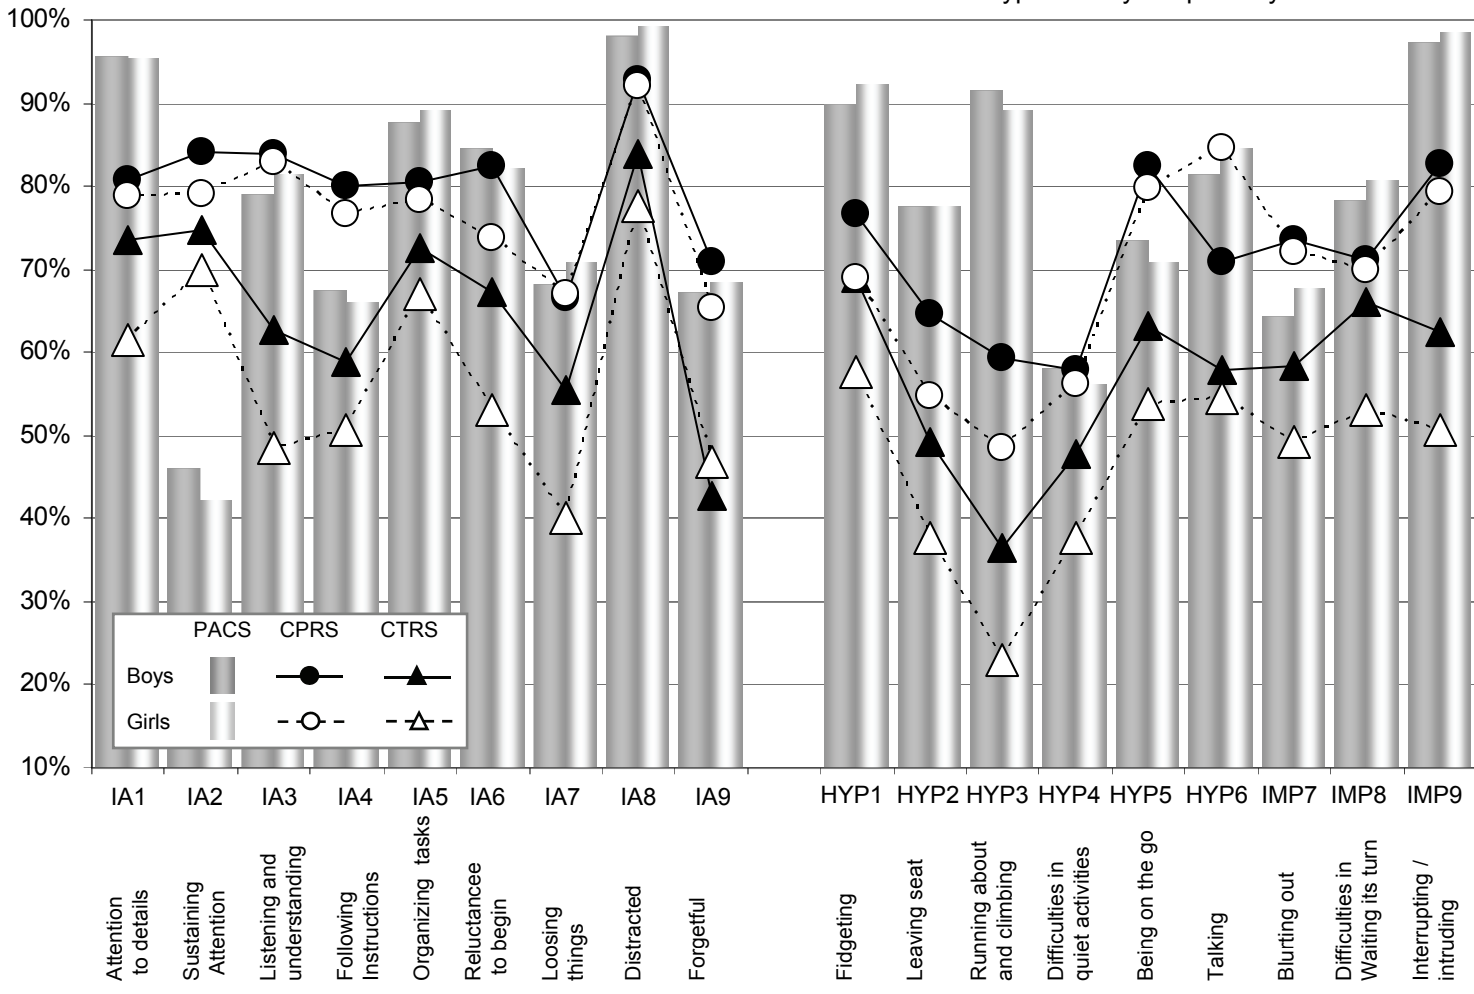

Supplement: MOESM5 [file 9478788]
